# Supplementary material for: Theoretical Study of Radical Inactivation, LOX Inhibition, and Iron Chelation: The Role of Ferulic Acid in Skin Protection against UVA Induced Oxidative Stress
Source: MDPI journal article supplement (doi:10.3390/antiox10081303), 2021-08-18
Supplement: s1 [file s1]

## Supporting Information

### Theoretical study of radical inactivation, LOX inhibition and iron chelation: a role of ferulic acid in skin protection against UVA induced oxidative stress

Ana Amić<sup>1\*</sup>, Jasmina M. Dimitrić Marković<sup>2</sup>, Zoran Marković<sup>3</sup>, Dejan Milenković<sup>3</sup>, Žiko Milanović<sup>3,4</sup>, Marko Antonijević<sup>3</sup>, Denisa Mastil'ák Cagardová<sup>5</sup>, Jaime Rodríguez-Guerra Pedregal<sup>6</sup>

<sup>1</sup> Department of Chemistry, Josip Juraj Strossmayer University of Osijek, Ulica cara Hadrijana 8A, 31000 Osijek, Croatia  
e-mail: aamic@kemija.unios.hr

<sup>2</sup> The Faculty of Physical Chemistry, University of Belgrade, Studentski trg 12-16, 11000 Belgrade, Serbia  
e-mail: markovich@ffh.bg.ac.rs

<sup>3</sup> Institute for Information Technologies, Department of Science, University of Kragujevac, 34000 Kragujevac, Serbia  
e-mail: zmarkovic@uni.kg.ac.rs; deki82@kg.ac.rs; mantonijevic@uni.kg.ac.rs

<sup>4</sup> Faculty of Science, Department of Chemistry, University of Kragujevac, Radoja Domanovića 2, 34000 Kragujevac, Serbia  
e-mail: ziko.milanovic@uni.kg.ac.rs

<sup>5</sup> Institute of Physical Chemistry and Chemical Physics, Department of Chemical Physics, Slovak University of Technology in Bratislava, Radlinského 9, SK-812 37 Bratislava, Slovak Republic  
e-mail: denisa.cagardova@stuba.sk

<sup>6</sup> In Silico Toxicology, Institute of Physiology, Charité - Universitätsmedizin Berlin, Charitéplatz 1, 10117 Berlin, Germany  
e-mail: jaime.rodriguez@charite.de

*\*corresponding author*

**Table S1.** Reaction Gibbs free energy ( $\Delta_r G$ , kcal/mol), activation Gibbs free energy ( $\Delta G^\ddagger$ , kcal/mol), TS imaginary frequency ( $\nu$ ,  $\text{cm}^{-1}$ ), TST rate constants ( $k^{\text{TST}}$  and  $k^{\text{TST/Eck}}$ ,  $\text{M}^{-1} \text{s}^{-1}$ ) and Eckart tunneling coefficient ( $\kappa^{\text{Eck}}$ ) in the H-atom abstraction from: a) 4-OH group of FA, b) 4-OH group of 5OHFA, and c) 5-OH group of 5OHFAPR by  $\cdot\text{OH}$  radical at 298.15 K in gas-phase.

|   | path | $\Delta_r G$ | $\Delta G^\ddagger$ | $\nu$ | $k^{\text{TST}}$   | $\kappa^{\text{Eck}}$ | $k^{\text{TST/Eck}}$  |
|---|------|--------------|---------------------|-------|--------------------|-----------------------|-----------------------|
| a | 4-OH | -29.9        | 6.5                 | -2347 | $1.08 \times 10^8$ | 21.4                  | $2.29 \times 10^9$    |
| b | 4-OH | -36.8        | 4.6                 | -2872 | $2.53 \times 10^9$ | 8.3                   | $2.11 \times 10^{10}$ |
| c | 5-OH | -43.1        | 4.7                 | -1163 | $2.29 \times 10^9$ | 3.3                   | $7.83 \times 10^9$    |

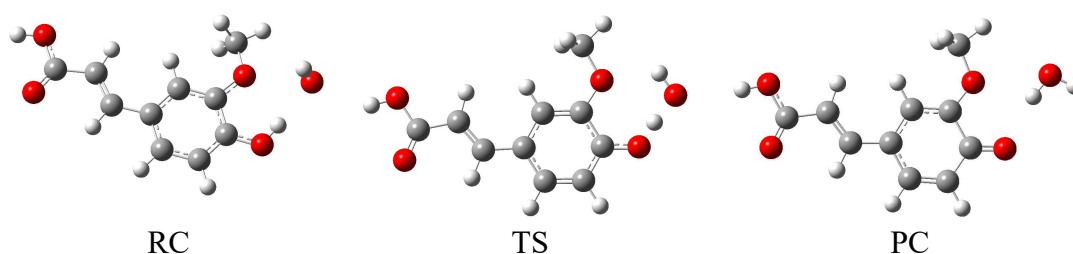

**Figure S1.** Optimized geometries obtained in gas-phase with the M06-2X/6-311++G(d,p) level of theory in the reaction of  $\cdot\text{OH}$  radical with 4-OH group of FA.

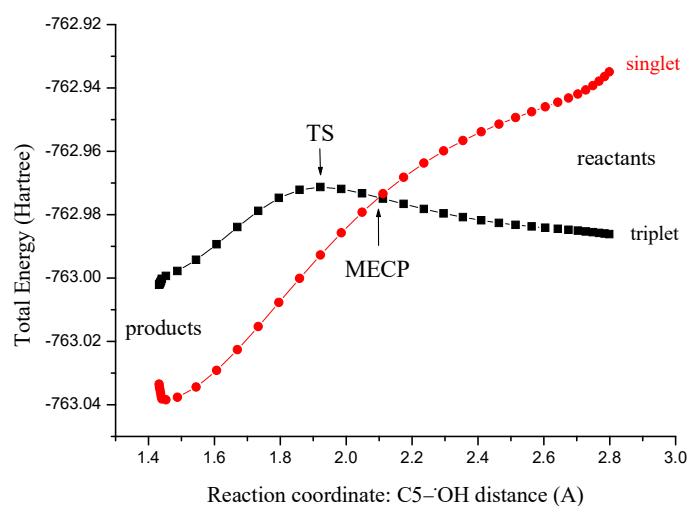

**Figure S2.** Energy profiles for RRC pathways of C5 site of FAPR with  $\cdot\text{OH}$  in the singlet (red line) and triplet (black line) states, created using published procedure [51].

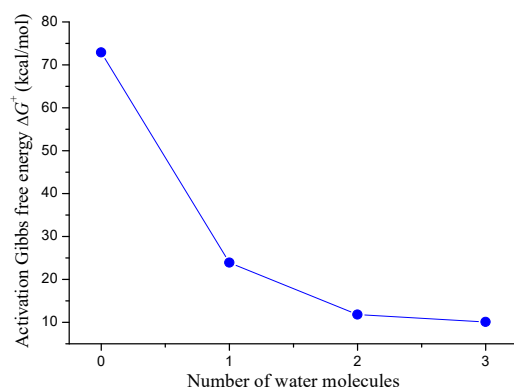

Figure S3. Activation Gibbs free energy ( $\Delta G^\ddagger$  in kcal/mol) as a function of the number of water molecules.

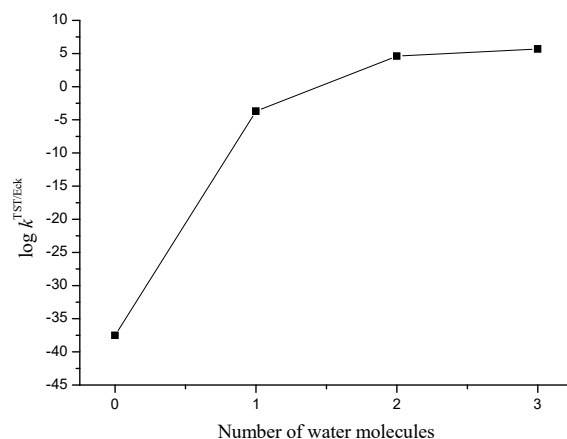

Figure S4. Reaction rate constant ( $k^{\text{TST/Eck}}$  in  $\text{M}^{-1} \text{s}^{-1}$ ) as a function of the number of water molecules.

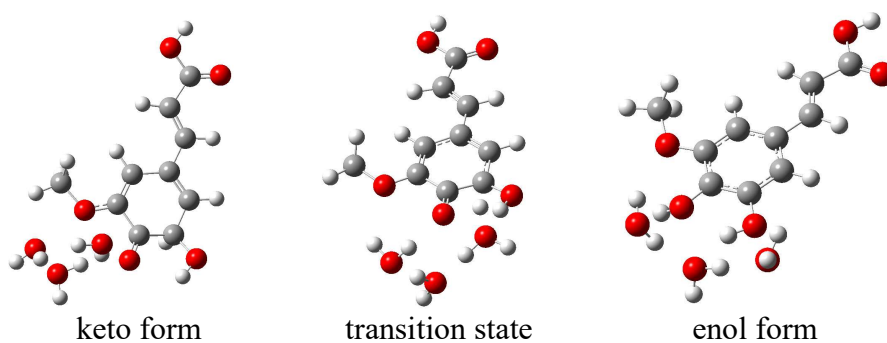

Figure S5. Optimized structures involved in keto-enol tautomerization aided by three catalytic water molecules.

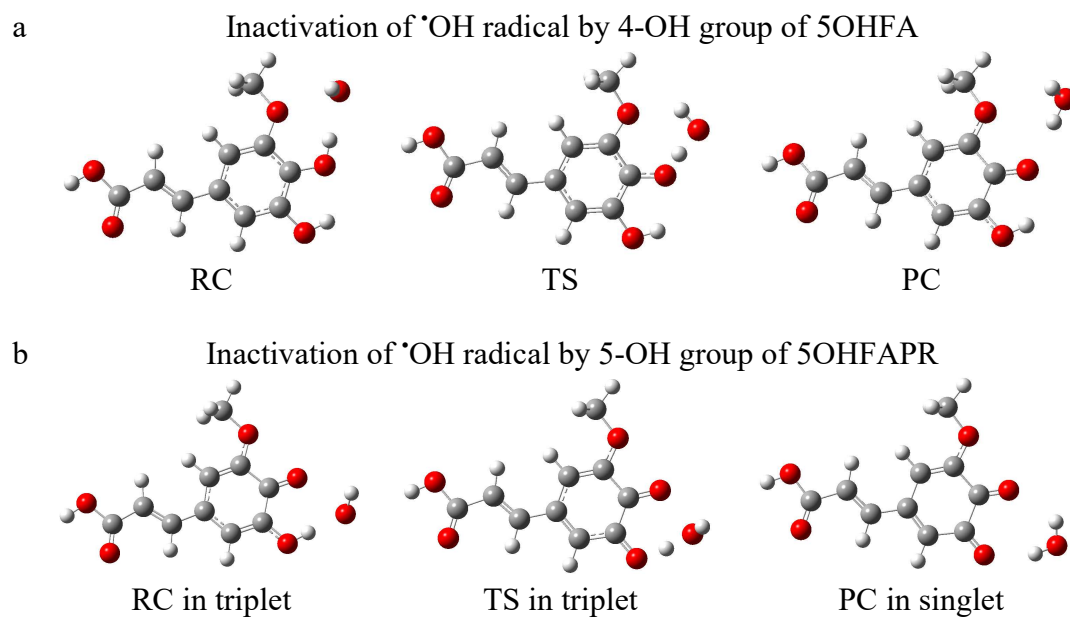

**Figure S6.** Optimized geometries obtained in gas-phase with the M06-2X/6-311++G(d,p) level of theory in the reaction of  $\cdot\text{OH}$  radical with: a) 4-OH group of 5OHFA, and b) 5-OH group of phenoxyl radical of 5-hydroxyferulic acid (5OHFAPR).

**Table S2.** Type of interactions and corresponding distance (Å) of most stable docking structures LOX-FA and LOX-5OHFA

| Conformation of the ligand | Interaction          | Category      | Type of interaction        | Distance (Å) |
|----------------------------|----------------------|---------------|----------------------------|--------------|
| <b>LOX-FA</b>              | Fe - A:HIS518:N      | Electrostatic | Metal-Acceptor             | 2.23         |
|                            | Fe - A:HIS523:N      | Electrostatic | Metal-Acceptor             | 2.24         |
|                            | Fe - A:HIS709:N      | Electrostatic | Metal-Acceptor             | 2.28         |
|                            | Fe - A:ASN713:O      | Electrostatic | Metal-Acceptor             | 2.28         |
|                            | Fe - A:ILE857:O      | Electrostatic | Metal-Acceptor             | 2.05         |
|                            | Fe - FA:OH           | Electrostatic | Metal-Acceptor             | 1.43         |
|                            | FA:H - A:ASN713:O    | Hydrogen Bond | Conventional Hydrogen Bond | 2.30         |
|                            | FA:H - A:ILE857:O    | Hydrogen Bond | Conventional Hydrogen Bond | 2.03         |
|                            | FA:H - A:GLN514:O    | Hydrogen Bond | Conventional Hydrogen Bond | 1.81         |
|                            | A:TRP519:C - FA      | Hydrophobic   | Pi-Sigma                   | 3.85         |
|                            | A:ILE572:C - FA      | Hydrophobic   | Pi-Sigma                   | 3.70         |
|                            | A:TRP519 - FA        | Hydrophobic   | Pi-Pi Stacked              | 5.31         |
|                            | FA - A:LEU565        | Hydrophobic   | Pi-Alkyl                   | 5.43         |
| <b>LOX-5OHFA</b>           | Fe - A:HIS518:N      | Electrostatic | Metal-Acceptor             | 2.23         |
|                            | Fe - A:HIS523:N      | Electrostatic | Metal-Acceptor             | 2.24         |
|                            | Fe - A:HIS709:N      | Electrostatic | Metal-Acceptor             | 2.28         |
|                            | Fe - A:ASN713:O      | Electrostatic | Metal-Acceptor             | 2.28         |
|                            | Fe - A:ILE857:O      | Electrostatic | Metal-Acceptor             | 2.05         |
|                            | Fe - 5OHFA:OH        | Electrostatic | Metal-Acceptor             | 1.39         |
|                            | 5OHFA:H - A:ASN713:O | Hydrogen Bond | Conventional Hydrogen Bond | 2.17         |
|                            | 5OHFA:H - A:ILE857:O | Hydrogen Bond | Conventional Hydrogen Bond | 2.23         |
|                            | 5OHFA:H - A:GLN514:O | Hydrogen Bond | Conventional Hydrogen Bond | 1.92         |
|                            | A:TRP519:C - 5OHFA   | Hydrophobic   | Pi-Sigma                   | 3.76         |
|                            | A:ILE572:C - 5OHFA   | Hydrophobic   | Pi-Sigma                   | 3.88         |
|                            | A:TRP519 - 5OHFA     | Hydrophobic   | Pi-Pi Stacked              | 5.13         |
|                            | 5OHFA - A:LEU565     | Hydrophobic   | Pi-Alkyl                   | 5.31         |

**Table S3.** Structures and Gibbs free energies  $\Delta_r G$  (kcal/mol) of the complexation reactions between  $\text{Fe}^{2+}$  and FA. Comparison of results published by Truong and co-workers [77] with those presented in this work.

|                                                                                   | Ref. 77                 | our result              |
|-----------------------------------------------------------------------------------|-------------------------|-------------------------|
| 1:1 $\text{Fe}^{2+}$ -FA                                                          | $\Delta_r G$ (kcal/mol) | $\Delta_r G$ (kcal/mol) |
| 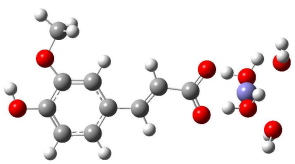 | -20.6                   | -9.25                   |
| 1:2 $\text{Fe}^{2+}$ -FA                                                          |                         |                         |
|  | -45.3                   | -20.55                  |

Truong and co-workers [77] used SMD/M05/6-311++g(d,p) level of theory in water as a solvent. Authors were not consider dianions of ferulic acid as chelators. Our results were obtained by using SMD/M06/6-311++g(d,p) level of theory in water as a solvent.

## Optimized geometries and corresponding Cartesian coordinates

M06-2X/6-311++G(d,p) optimized geometry of TS for the reaction of 4-OH group of ferulic acid with  $\cdot\text{OH}$  radical in gas-phase.

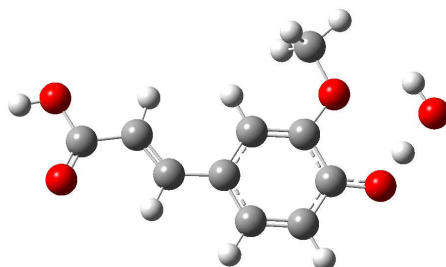

|   |              |              |              |
|---|--------------|--------------|--------------|
| 6 | 2.230897000  | -0.997618000 | -0.173110000 |
| 6 | 1.600336000  | 0.277140000  | -0.157016000 |
| 6 | 0.223867000  | 0.375918000  | -0.075441000 |
| 6 | -0.572433000 | -0.779036000 | -0.021403000 |
| 6 | 0.052031000  | -2.032904000 | -0.028366000 |
| 6 | 1.427853000  | -2.140391000 | -0.090599000 |
| 8 | 3.534337000  | -1.138992000 | -0.291104000 |
| 1 | 4.148082000  | -0.340237000 | -0.005246000 |
| 8 | 4.936258000  | 0.511342000  | 0.740739000  |
| 1 | 1.926022000  | -3.101583000 | -0.091734000 |
| 1 | -0.557329000 | -2.928194000 | 0.017184000  |
| 1 | -0.247647000 | 1.348622000  | -0.055372000 |
| 8 | 2.450478000  | 1.333285000  | -0.201638000 |
| 6 | 1.886847000  | 2.635147000  | -0.216369000 |
| 1 | 1.318733000  | 2.825476000  | 0.698302000  |
| 1 | 2.724317000  | 3.326550000  | -0.279083000 |
| 1 | 1.242524000  | 2.765228000  | -1.089844000 |
| 6 | -2.028775000 | -0.721344000 | 0.046207000  |
| 6 | -2.801559000 | 0.370653000  | -0.001878000 |
| 1 | -2.541139000 | -1.676212000 | 0.143091000  |
| 1 | -2.418870000 | 1.377828000  | -0.106676000 |
| 6 | -4.267323000 | 0.223868000  | 0.085670000  |
| 8 | -4.887541000 | 1.420921000  | 0.016316000  |
| 8 | -4.872013000 | -0.809484000 | 0.203803000  |
| 1 | -5.837102000 | 1.253420000  | 0.079260000  |
| 1 | 4.439813000  | 1.343922000  | 0.739007000  |

M06-2X/6-311++G(d,p) optimized geometry of TS (in triplet) for the reaction of C5 site of ferulic acid phenoxyl radical with  $\cdot\text{OH}$  radical in gas-phase.

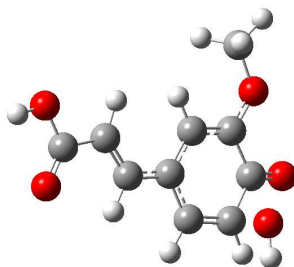

|   |              |              |              |
|---|--------------|--------------|--------------|
| 6 | 1.880599000  | 0.730294000  | -0.119034000 |
| 6 | 2.693490000  | -0.471309000 | -0.378069000 |
| 6 | 1.943731000  | -1.735015000 | -0.370920000 |
| 6 | 0.561470000  | -1.726797000 | -0.459431000 |
| 6 | -0.198570000 | -0.518257000 | -0.226876000 |
| 6 | 0.484051000  | 0.675369000  | -0.047001000 |
| 1 | 2.514385000  | -2.607398000 | -0.664227000 |
| 1 | 0.022041000  | -2.650872000 | -0.635362000 |
| 1 | -0.075197000 | 1.582903000  | 0.136465000  |
| 8 | 3.897881000  | -0.414002000 | -0.563256000 |
| 8 | 2.592683000  | 1.834954000  | 0.014494000  |
| 6 | 1.931885000  | 3.062940000  | 0.283660000  |
| 1 | 1.371769000  | 3.001341000  | 1.219946000  |
| 1 | 2.719219000  | 3.805913000  | 0.374447000  |
| 1 | 1.264145000  | 3.329857000  | -0.539469000 |
| 6 | -1.640004000 | -0.619436000 | -0.209484000 |
| 6 | -2.521699000 | 0.375541000  | -0.003985000 |
| 1 | -2.060248000 | -1.608750000 | -0.376248000 |
| 1 | -2.239898000 | 1.404490000  | 0.179857000  |
| 6 | -3.965791000 | 0.074632000  | -0.019464000 |
| 8 | -4.460136000 | -1.006645000 | -0.205657000 |
| 8 | -4.702392000 | 1.181823000  | 0.205095000  |
| 1 | -5.631654000 | 0.917205000  | 0.182483000  |
| 8 | 1.830021000  | -2.007239000 | 1.528546000  |
| 1 | 1.836006000  | -2.973582000 | 1.591956000  |



M06-2X/6-311++G(d,p) geometry of MECP (in singlet) for the reaction of C5 site of ferulic acid phenoxyl radical with  $\cdot\text{OH}$  radical in gas-phase.

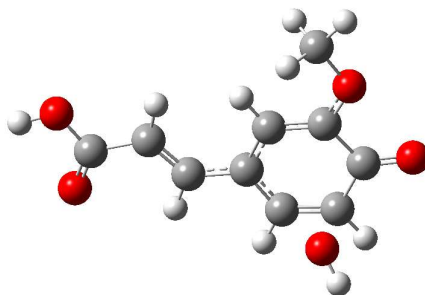

|   |              |              |              |
|---|--------------|--------------|--------------|
| 6 | 1.856157000  | 0.705950000  | -0.156301000 |
| 6 | 2.661720000  | -0.516360000 | -0.437341000 |
| 6 | 1.898508000  | -1.769468000 | -0.467100000 |
| 6 | 0.527037000  | -1.772020000 | -0.452266000 |
| 6 | -0.202401000 | -0.574089000 | -0.248867000 |
| 6 | 0.485720000  | 0.651478000  | -0.089181000 |
| 1 | 2.471862000  | -2.668053000 | -0.662995000 |
| 1 | -0.017435000 | -2.703948000 | -0.553515000 |
| 1 | -0.081580000 | 1.553603000  | 0.093049000  |
| 8 | 3.859494000  | -0.466208000 | -0.627660000 |
| 8 | 2.593784000  | 1.796634000  | -0.018506000 |
| 6 | 1.939819000  | 3.022059000  | 0.268104000  |
| 1 | 1.368794000  | 2.942479000  | 1.196797000  |
| 1 | 2.729743000  | 3.758715000  | 0.384153000  |
| 1 | 1.279484000  | 3.309444000  | -0.555304000 |
| 6 | -1.646006000 | -0.661182000 | -0.205246000 |
| 6 | -2.509421000 | 0.353897000  | -0.030199000 |
| 1 | -2.077060000 | -1.651834000 | -0.327369000 |
| 1 | -2.209434000 | 1.385084000  | 0.103290000  |
| 6 | -3.960042000 | 0.076341000  | -0.011928000 |
| 8 | -4.473815000 | -1.002503000 | -0.150073000 |
| 8 | -4.673747000 | 1.203504000  | 0.182409000  |
| 1 | -5.607996000 | 0.955284000  | 0.185886000  |
| 8 | 1.894013000  | -1.703854000 | 1.766869000  |
| 1 | 2.239236000  | -2.600995000 | 1.893645000  |

M06-2X/6-311++G(d,p) optimized geometry of TS for the reaction of 4-OH group of 5-hydroxyferulic acid with  $\cdot\text{OH}$  radical in gas-phase.

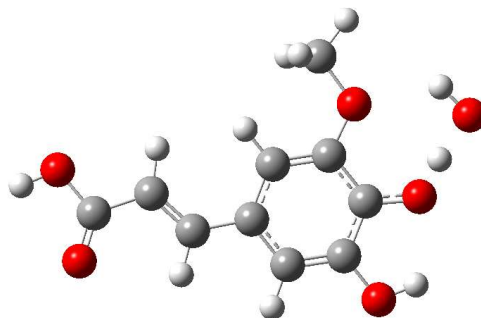

|   |              |              |              |
|---|--------------|--------------|--------------|
| 6 | 2.116124000  | -0.624195000 | -0.143772000 |
| 6 | 1.413195000  | 0.599461000  | -0.126731000 |
| 6 | 0.031172000  | 0.612935000  | -0.055164000 |
| 6 | -0.680213000 | -0.597359000 | -0.004489000 |
| 6 | 0.008356000  | -1.812181000 | -0.005622000 |
| 6 | 1.391500000  | -1.826811000 | -0.067845000 |
| 8 | 3.434061000  | -0.735145000 | -0.239249000 |
| 1 | 4.011985000  | 0.088585000  | 0.016721000  |
| 8 | 4.802276000  | 1.063810000  | 0.656096000  |
| 1 | -0.523182000 | -2.754686000 | 0.042068000  |
| 1 | -0.503745000 | 1.551102000  | -0.031809000 |
| 8 | 2.202037000  | 1.707084000  | -0.161726000 |
| 6 | 1.554579000  | 2.968972000  | -0.216131000 |
| 1 | 0.966142000  | 3.145180000  | 0.688277000  |
| 1 | 2.345191000  | 3.712633000  | -0.290292000 |
| 1 | 0.911975000  | 3.032044000  | -1.097946000 |
| 6 | -2.140162000 | -0.635575000 | 0.057788000  |
| 6 | -2.979568000 | 0.403727000  | -0.013646000 |
| 1 | -2.589532000 | -1.619712000 | 0.170947000  |
| 1 | -2.660317000 | 1.430362000  | -0.138409000 |
| 6 | -4.434243000 | 0.167774000  | 0.074963000  |
| 8 | -5.126676000 | 1.322974000  | -0.016527000 |
| 8 | -4.974184000 | -0.898468000 | 0.211688000  |
| 1 | -6.064248000 | 1.098677000  | 0.049684000  |
| 1 | 4.218179000  | 1.839258000  | 0.634011000  |
| 8 | 2.061912000  | -2.993985000 | -0.068203000 |
| 1 | 3.007714000  | -2.794095000 | -0.095978000 |

M06-2X/6-311++G(d,p) optimized geometry of TS (in triplet) for the reaction of 5-OH group of phenoxyl radical of 5-hydroxyferulic acid with  $\cdot\text{OH}$  radical in gas-phase.

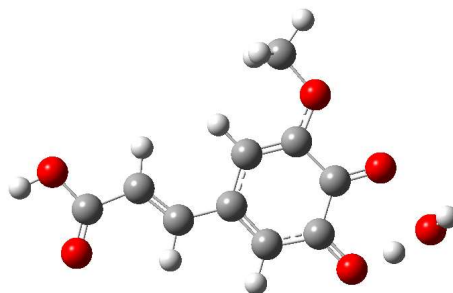

|   |              |              |              |
|---|--------------|--------------|--------------|
| 6 | 2.240151000  | 0.054275000  | 0.005995000  |
| 6 | 1.272059000  | 1.141691000  | 0.009422000  |
| 6 | -0.066061000 | 0.877033000  | 0.006952000  |
| 6 | -0.542063000 | -0.472937000 | 0.009393000  |
| 6 | 0.338699000  | -1.529283000 | 0.017442000  |
| 6 | 1.738513000  | -1.325257000 | 0.014811000  |
| 8 | 3.469684000  | 0.338980000  | 0.006988000  |
| 8 | 4.726308000  | -1.353787000 | -0.160323000 |
| 1 | -0.011811000 | -2.553958000 | 0.022942000  |
| 1 | -0.776738000 | 1.690024000  | 0.003836000  |
| 8 | 1.839026000  | 2.357014000  | 0.013747000  |
| 6 | 0.976058000  | 3.478735000  | -0.001434000 |
| 1 | 0.339218000  | 3.491501000  | 0.888191000  |
| 1 | 1.622354000  | 4.352425000  | -0.002367000 |
| 1 | 0.354382000  | 3.478409000  | -0.901713000 |
| 6 | -1.972607000 | -0.767892000 | 0.007037000  |
| 6 | -2.973209000 | 0.120277000  | -0.007880000 |
| 1 | -2.246455000 | -1.820241000 | 0.017746000  |
| 1 | -2.831224000 | 1.192991000  | -0.021276000 |
| 6 | -4.371491000 | -0.361810000 | -0.007343000 |
| 8 | -5.243581000 | 0.666237000  | -0.026013000 |
| 8 | -4.723104000 | -1.511212000 | 0.007587000  |
| 1 | -6.133122000 | 0.288647000  | -0.025272000 |
| 1 | 5.100405000  | -1.075398000 | 0.685395000  |
| 8 | 2.561027000  | -2.299799000 | 0.036768000  |
| 1 | 3.707822000  | -1.912881000 | -0.023889000 |

M06-2X/6-311++G(d,p) optimized geometry of TS for keto-enol tautomerization of 5-hydroxyferulic acid in gas-phase.

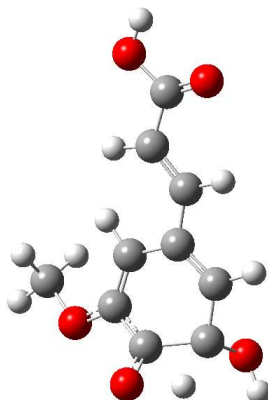

|   |              |              |              |
|---|--------------|--------------|--------------|
| 6 | -0.442083000 | 0.700049000  | -0.101664000 |
| 6 | -1.762420000 | 0.918057000  | 0.055025000  |
| 6 | -2.440672000 | -0.281013000 | 0.499243000  |
| 6 | -2.097525000 | -1.702746000 | -0.031514000 |
| 6 | -0.623881000 | -1.779406000 | -0.053358000 |
| 6 | 0.144976000  | -0.654213000 | -0.015948000 |
| 1 | 0.230125000  | 1.529421000  | -0.285649000 |
| 1 | -0.163703000 | -2.750425000 | -0.193789000 |
| 8 | -3.135158000 | -0.437858000 | 1.577122000  |
| 8 | -2.466225000 | 2.051797000  | -0.066581000 |
| 1 | -3.036639000 | -1.701157000 | 0.985031000  |
| 6 | -1.745254000 | 3.189887000  | -0.543739000 |
| 1 | -1.261332000 | 2.965924000  | -1.507089000 |
| 1 | -2.475742000 | 3.990138000  | -0.678706000 |
| 1 | -0.992514000 | 3.515725000  | 0.197393000  |
| 8 | -2.652066000 | -2.108357000 | -1.296389000 |
| 1 | -3.424954000 | -2.661671000 | -1.108750000 |
| 6 | 1.600696000  | -0.768874000 | 0.010191000  |
| 6 | 2.488467000  | 0.243055000  | 0.061362000  |
| 1 | 2.004527000  | -1.772325000 | -0.011371000 |
| 1 | 2.214016000  | 1.283349000  | 0.111460000  |
| 6 | 3.937483000  | -0.044531000 | 0.063916000  |
| 8 | 4.456319000  | -1.127657000 | 0.062654000  |
| 8 | 4.666763000  | 1.101188000  | 0.067395000  |
| 1 | 5.590441000  | 0.846525000  | 0.076780000  |

M06-2X/6-311++G(d,p) optimized geometry of TS for keto-enol tautomerization of 5-hydroxyferulic acid aided by one water molecule in gas-phase.

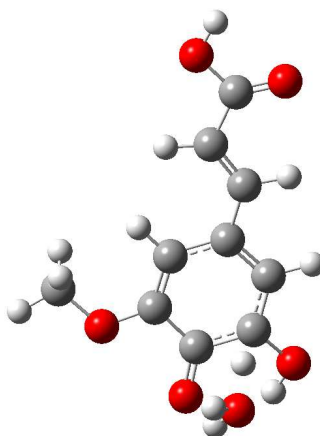

|   |              |              |              |
|---|--------------|--------------|--------------|
| 6 | 0.491050000  | -0.455578000 | -0.202754000 |
| 6 | -0.068421000 | 0.855366000  | -0.121361000 |
| 6 | -1.418833000 | 1.073870000  | -0.204783000 |
| 6 | -2.344331000 | -0.029121000 | -0.405558000 |
| 6 | -0.348401000 | -1.531968000 | -0.383281000 |
| 1 | 0.599787000  | 1.693656000  | 0.022782000  |
| 1 | -2.156732000 | -1.174190000 | 1.003952000  |
| 8 | -3.601021000 | 0.077046000  | -0.390514000 |
| 8 | -3.062962000 | -1.169752000 | 1.857219000  |
| 1 | -3.699344000 | -0.685448000 | 1.263174000  |
| 1 | -2.837001000 | -0.583681000 | 2.589718000  |
| 6 | -1.748660000 | -1.339566000 | -0.410025000 |
| 8 | -2.570514000 | -2.390154000 | -0.744944000 |
| 1 | -3.423732000 | -1.996753000 | -0.982697000 |
| 1 | 0.039028000  | -2.539149000 | -0.488960000 |
| 8 | -2.025711000 | 2.275771000  | -0.132685000 |
| 6 | -1.198950000 | 3.418015000  | -0.051573000 |
| 1 | -0.528954000 | 3.477615000  | -0.915181000 |
| 1 | -1.868022000 | 4.274977000  | -0.048333000 |
| 1 | -0.605902000 | 3.413220000  | 0.869065000  |
| 6 | 1.926674000  | -0.689930000 | -0.114816000 |
| 1 | 2.245228000  | -1.728396000 | -0.179433000 |
| 6 | 2.893852000  | 0.224500000  | 0.034593000  |
| 1 | 2.713780000  | 1.289281000  | 0.105401000  |
| 6 | 4.298121000  | -0.214756000 | 0.102702000  |
| 8 | 5.138733000  | 0.834411000  | 0.242594000  |
| 1 | 6.034775000  | 0.475013000  | 0.276948000  |
| 8 | 4.695786000  | -1.349964000 | 0.046418000  |

M06-2X/6-311++G(d,p) optimized geometry of TS for keto-enol tautomerization of 5-hydroxyferulic acid aided by two water molecules in gas-phase.

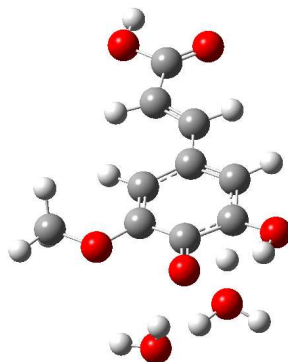

|   |              |              |              |
|---|--------------|--------------|--------------|
| 6 | -0.794577000 | -0.513510000 | -0.273451000 |
| 6 | -0.153599000 | 0.767691000  | -0.261713000 |
| 6 | 1.190513000  | 0.907245000  | -0.462197000 |
| 6 | 2.031531000  | -0.248998000 | -0.750560000 |
| 6 | 1.386435000  | -1.525934000 | -0.554726000 |
| 6 | -0.028027000 | -1.637717000 | -0.460679000 |
| 1 | -0.759466000 | 1.644592000  | -0.074674000 |
| 8 | 3.257125000  | -0.192596000 | -0.980163000 |
| 1 | 1.659393000  | -1.292719000 | 0.769265000  |
| 8 | 3.855625000  | 0.729564000  | 1.475323000  |
| 1 | 3.909127000  | 0.597403000  | 0.504167000  |
| 1 | 3.551230000  | 1.634591000  | 1.585719000  |
| 8 | 2.187015000  | -1.193943000 | 1.968722000  |
| 1 | 2.861563000  | -0.446060000 | 1.903804000  |
| 1 | 2.647405000  | -2.001657000 | 2.221184000  |
| 8 | 1.872968000  | 2.077483000  | -0.462767000 |
| 1 | -0.470932000 | -2.627473000 | -0.482390000 |
| 8 | 2.137940000  | -2.639756000 | -0.866043000 |
| 1 | 2.998247000  | -2.297373000 | -1.154502000 |
| 6 | 1.115932000  | 3.270238000  | -0.389081000 |
| 1 | 1.828307000  | 4.086795000  | -0.481271000 |
| 1 | 0.391782000  | 3.320705000  | -1.207777000 |
| 1 | 0.590346000  | 3.347486000  | 0.568376000  |
| 6 | -2.233370000 | -0.657272000 | -0.099866000 |
| 1 | -2.612480000 | -1.677045000 | -0.089265000 |
| 6 | -3.138827000 | 0.319686000  | 0.040585000  |
| 1 | -2.896636000 | 1.374583000  | 0.037338000  |
| 6 | -4.559846000 | -0.031841000 | 0.203718000  |
| 8 | -5.022107000 | -1.143198000 | 0.235600000  |
| 8 | -5.332438000 | 1.071270000  | 0.320026000  |
| 1 | -6.243903000 | 0.768045000  | 0.422265000  |

M06-2X/6-311++G(d,p) optimized geometry of TS for keto-enol tautomerization of 5-hydroxyferulic acid aided by three water molecules in gas-phase.

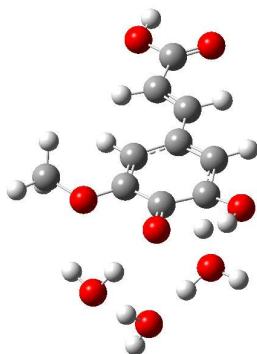

|   |              |              |              |
|---|--------------|--------------|--------------|
| 6 | -1.141324000 | -0.479951000 | -0.389583000 |
| 6 | -0.456265000 | 0.778436000  | -0.306390000 |
| 6 | 0.879494000  | 0.900583000  | -0.555020000 |
| 6 | 1.676491000  | -0.258100000 | -0.950533000 |
| 6 | 0.995593000  | -1.531403000 | -0.832664000 |
| 6 | -0.423348000 | -1.602617000 | -0.711312000 |
| 1 | -1.031812000 | 1.658250000  | -0.050024000 |
| 8 | 2.875222000  | -0.223701000 | -1.279196000 |
| 1 | 1.284189000  | -1.559680000 | 0.471235000  |
| 8 | 4.249738000  | 1.411684000  | 0.378294000  |
| 1 | 3.966840000  | 0.863370000  | -0.382323000 |
| 1 | 3.602171000  | 2.123237000  | 0.350515000  |
| 8 | 1.795435000  | -1.915373000 | 1.652958000  |
| 1 | 2.527665000  | -1.283986000 | 1.942219000  |
| 1 | 2.195391000  | -2.783681000 | 1.531772000  |
| 8 | 1.573687000  | 2.068066000  | -0.555631000 |
| 1 | -0.900180000 | -2.572607000 | -0.803583000 |
| 8 | 1.684468000  | -2.627938000 | -1.323079000 |
| 1 | 2.539150000  | -2.281410000 | -1.622668000 |
| 6 | 0.829239000  | 3.266771000  | -0.434863000 |
| 1 | 1.542335000  | 4.079605000  | -0.554376000 |
| 1 | 0.067996000  | 3.328783000  | -1.218016000 |
| 1 | 0.352958000  | 3.339300000  | 0.547760000  |
| 6 | -2.573800000 | -0.593027000 | -0.155834000 |
| 1 | -2.996704000 | -1.589668000 | -0.263716000 |
| 6 | -3.425956000 | 0.386562000  | 0.174454000  |
| 1 | -3.135658000 | 1.419486000  | 0.315171000  |
| 6 | -4.851271000 | 0.068923000  | 0.365623000  |
| 8 | -5.363214000 | -1.015477000 | 0.254681000  |
| 8 | -5.563991000 | 1.169362000  | 0.694426000  |
| 1 | -6.481760000 | 0.888620000  | 0.803967000  |
| 8 | 3.693578000  | -0.320183000 | 2.291653000  |
| 1 | 3.890594000  | 0.014191000  | 3.168014000  |
| 1 | 3.964332000  | 0.367620000  | 1.627926000  |

M06/6-311++G(d,p) optimized geometry of  $[\text{Fe}(\text{H}_2\text{O})_6]^{2+}$  in water.

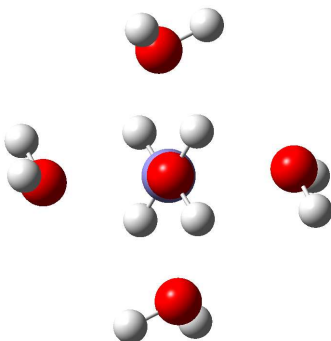

|    |              |              |              |
|----|--------------|--------------|--------------|
| 26 | 0.000000000  | 0.000000000  | 0.000000000  |
| 8  | -1.824913000 | -0.516134000 | -1.124891000 |
| 8  | 1.193712000  | -0.940927000 | -1.603175000 |
| 1  | 2.138018000  | -0.758932000 | -1.525287000 |
| 1  | 1.118512000  | -1.902485000 | -1.584923000 |
| 8  | -1.193712000 | 0.940927000  | 1.603175000  |
| 1  | -2.138018000 | 0.758932000  | 1.525287000  |
| 1  | -1.118512000 | 1.902485000  | 1.584923000  |
| 8  | -0.105964000 | -1.898623000 | 1.096580000  |
| 1  | 0.707502000  | -2.409272000 | 1.000422000  |
| 1  | -0.204521000 | -1.753639000 | 2.045580000  |
| 8  | 0.105964000  | 1.898623000  | -1.096580000 |
| 1  | 0.204521000  | 1.753639000  | -2.045580000 |
| 1  | -0.707502000 | 2.409272000  | -1.000422000 |
| 8  | 1.824913000  | 0.516134000  | 1.124891000  |
| 1  | 1.654363000  | 0.483296000  | 2.074546000  |
| 1  | 2.069493000  | 1.432180000  | 0.943396000  |
| 1  | -1.654363000 | -0.483296000 | -2.074546000 |
| 1  | -2.069493000 | -1.432180000 | -0.943396000 |



M06/6-311++G(d,p) optimized geometry of 1:1  $\text{Fe}^{2+}$ -FA complex in water.

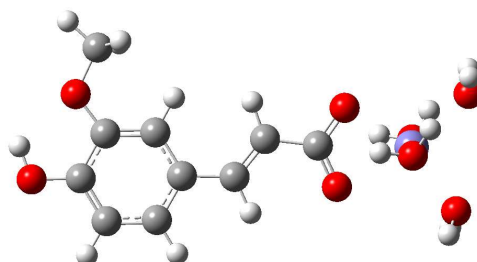

|    |              |              |              |
|----|--------------|--------------|--------------|
| 6  | -3.304443000 | 0.460805000  | 0.012007000  |
| 6  | -4.682967000 | 0.431072000  | 0.017733000  |
| 6  | -5.362435000 | -0.801620000 | 0.003414000  |
| 6  | -4.648030000 | -1.982921000 | -0.022051000 |
| 6  | -3.260613000 | -1.950121000 | -0.033406000 |
| 6  | -2.570465000 | -0.737973000 | -0.013048000 |
| 6  | -1.118357000 | -0.763602000 | -0.022113000 |
| 6  | -0.277826000 | 0.277872000  | 0.052776000  |
| 6  | 1.180506000  | 0.100088000  | 0.029037000  |
| 6  | -4.900553000 | 2.799774000  | -0.026400000 |
| 8  | -5.500989000 | 1.515570000  | 0.032972000  |
| 8  | 1.705133000  | -1.038883000 | -0.098453000 |
| 8  | 1.916877000  | 1.137992000  | 0.139385000  |
| 8  | -6.718953000 | -0.833114000 | 0.009512000  |
| 1  | -0.676386000 | -1.757744000 | -0.097527000 |
| 1  | -0.631055000 | 1.302355000  | 0.141143000  |
| 1  | -2.698792000 | -2.879640000 | -0.056648000 |
| 1  | -5.191010000 | -2.922803000 | -0.037078000 |
| 1  | -2.785214000 | 1.413383000  | 0.022196000  |
| 1  | -4.309266000 | 2.911962000  | -0.941482000 |
| 1  | -5.717193000 | 3.520881000  | -0.031103000 |
| 1  | -4.264623000 | 2.977315000  | 0.847258000  |
| 1  | -7.053461000 | 0.076016000  | 0.015302000  |
| 26 | 3.764643000  | 0.050998000  | -0.004867000 |
| 8  | 3.798480000  | -0.179809000 | 2.216857000  |
| 8  | 4.992463000  | -1.709159000 | -0.217684000 |
| 1  | 4.791293000  | -2.363100000 | 0.463543000  |
| 1  | 4.834396000  | -2.154467000 | -1.059686000 |
| 8  | 5.336196000  | 1.522480000  | 0.168967000  |
| 1  | 5.339562000  | 2.214518000  | -0.503423000 |
| 1  | 5.371553000  | 1.980642000  | 1.017360000  |
| 8  | 3.780221000  | 0.267587000  | -2.223498000 |
| 1  | 2.875212000  | 0.385559000  | -2.537174000 |
| 1  | 4.250802000  | 1.061138000  | -2.505853000 |
| 1  | 4.281832000  | 0.549063000  | 2.624219000  |
| 1  | 2.897312000  | -0.102572000 | 2.553327000  |

M06/6-311++G(d,p) optimized geometry of 1:1  $\text{Fe}^{2+}$ -5OHFA complex in water.

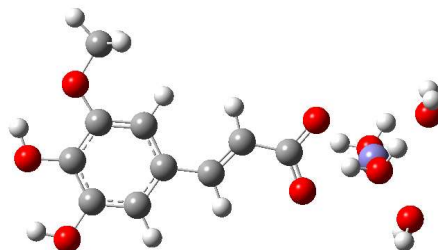

|    |              |              |              |
|----|--------------|--------------|--------------|
| 6  | 3.017365000  | 0.763212000  | -0.017385000 |
| 6  | 4.398967000  | 0.809157000  | -0.008431000 |
| 6  | 5.150364000  | -0.373306000 | 0.004196000  |
| 6  | 4.503003000  | -1.600286000 | 0.010583000  |
| 6  | 3.117755000  | -1.652441000 | 0.005040000  |
| 6  | 2.364537000  | -0.479614000 | -0.010242000 |
| 6  | 0.915524000  | -0.602068000 | -0.011286000 |
| 6  | 0.012585000  | 0.385875000  | -0.059753000 |
| 6  | -1.434296000 | 0.122505000  | -0.044719000 |
| 6  | 4.473969000  | 3.185477000  | 0.005662000  |
| 8  | 5.153022000  | 1.938717000  | -0.008166000 |
| 8  | -1.897344000 | -1.042645000 | 0.064604000  |
| 8  | -2.220204000 | 1.124809000  | -0.139640000 |
| 8  | 6.509037000  | -0.363152000 | 0.013936000  |
| 1  | 0.540420000  | -1.624892000 | 0.033457000  |
| 1  | 0.301891000  | 1.432706000  | -0.113540000 |
| 1  | 2.627876000  | -2.622022000 | 0.013234000  |
| 1  | 2.442571000  | 1.682097000  | -0.025333000 |
| 1  | 3.854306000  | 3.282503000  | 0.903437000  |
| 1  | 5.245210000  | 3.954834000  | 0.011662000  |
| 1  | 3.849970000  | 3.301212000  | -0.886670000 |
| 1  | 6.823011000  | 0.552808000  | 0.015978000  |
| 26 | -4.027432000 | -0.002594000 | 0.009867000  |
| 8  | -4.071345000 | -0.228364000 | -2.209075000 |
| 8  | -5.214432000 | -1.779626000 | 0.231325000  |
| 1  | -5.020366000 | -2.428971000 | -0.456405000 |
| 1  | -5.040950000 | -2.227879000 | 1.068760000  |
| 8  | -5.627697000 | 1.440469000  | -0.151230000 |
| 1  | -5.639980000 | 2.129683000  | 0.523897000  |
| 1  | -5.669641000 | 1.902101000  | -0.997464000 |
| 8  | -4.032770000 | 0.207307000  | 2.233722000  |
| 1  | -3.127433000 | 0.329047000  | 2.544891000  |
| 1  | -4.505846000 | 0.998726000  | 2.517794000  |
| 1  | -4.568324000 | 0.491368000  | -2.616184000 |
| 1  | -3.174007000 | -0.140855000 | -2.553188000 |
| 8  | 5.213703000  | -2.763793000 | 0.024713000  |
| 1  | 6.160119000  | -2.565841000 | 0.035639000  |

M06/6-311++G(d,p) optimized geometry of 1:2  $\text{Fe}^{2+}$ -FA complex in water.

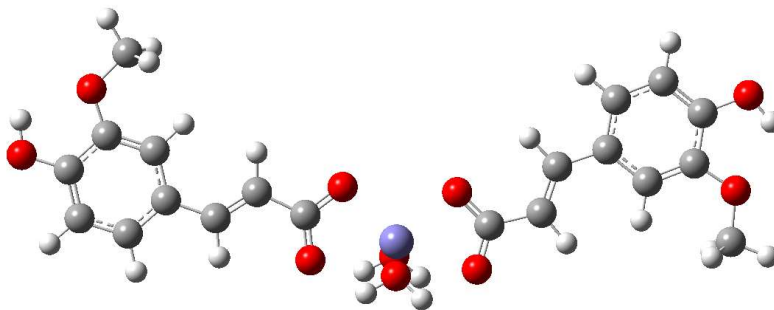

|    |              |              |              |
|----|--------------|--------------|--------------|
| 26 | 0.030381000  | -1.479953000 | 0.022952000  |
| 8  | -0.006295000 | -2.152719000 | -2.054614000 |
| 8  | -0.011744000 | -2.152289000 | 2.100472000  |
| 1  | 0.697210000  | -2.766345000 | 2.325520000  |
| 1  | -0.832035000 | -2.594420000 | 2.349385000  |
| 1  | -0.825407000 | -2.596348000 | -2.304688000 |
| 1  | 0.704048000  | -2.765737000 | -2.278134000 |
| 6  | -6.606405000 | 1.034680000  | 0.010815000  |
| 6  | -7.921118000 | 1.450801000  | -0.006889000 |
| 6  | -8.960702000 | 0.504301000  | -0.065473000 |
| 6  | -8.663348000 | -0.843889000 | -0.103977000 |
| 6  | -7.339068000 | -1.259964000 | -0.084345000 |
| 6  | -6.295976000 | -0.335577000 | -0.028698000 |
| 6  | -4.928450000 | -0.826415000 | -0.014687000 |
| 6  | -3.799027000 | -0.105744000 | 0.015291000  |
| 6  | -2.470497000 | -0.737567000 | 0.020953000  |
| 6  | -7.362224000 | 3.757207000  | 0.162411000  |
| 8  | -8.344153000 | 2.741305000  | 0.031667000  |
| 8  | -2.331214000 | -1.986705000 | 0.016947000  |
| 8  | -1.449568000 | 0.032542000  | 0.028136000  |
| 1  | -4.829483000 | -1.912449000 | -0.033970000 |
| 1  | -3.805789000 | 0.981412000  | 0.031377000  |
| 1  | -7.107035000 | -2.320824000 | -0.112643000 |
| 1  | -5.810757000 | 1.770392000  | 0.056108000  |
| 1  | -6.691264000 | 3.770120000  | -0.703377000 |
| 1  | -7.903661000 | 4.701234000  | 0.214220000  |
| 1  | -6.777975000 | 3.620561000  | 1.078838000  |
| 6  | 6.913257000  | 0.173180000  | -0.001849000 |
| 6  | 8.200788000  | 0.667500000  | -0.014681000 |
| 6  | 8.422832000  | 2.056776000  | -0.043231000 |
| 6  | 7.350511000  | 2.926830000  | -0.058004000 |
| 6  | 6.055823000  | 2.426575000  | -0.044695000 |
| 6  | 5.816757000  | 1.052705000  | -0.017153000 |
| 6  | 4.441201000  | 0.584743000  | -0.006277000 |
| 6  | 4.009083000  | -0.683868000 | 0.011249000  |

|   |               |              |              |
|---|---------------|--------------|--------------|
| 6 | 2.580164000   | -1.028730000 | 0.018102000  |
| 6 | 9.205322000   | -1.488968000 | 0.045389000  |
| 8 | 9.337520000   | -0.076759000 | -0.001948000 |
| 8 | 1.694241000   | -0.115153000 | 0.017137000  |
| 8 | 2.239637000   | -2.244870000 | 0.024448000  |
| 1 | 3.687577000   | 1.372549000  | -0.014362000 |
| 1 | 4.695587000   | -1.527123000 | 0.018416000  |
| 1 | 5.212773000   | 3.111625000  | -0.056201000 |
| 1 | 6.747289000   | -0.898706000 | 0.019589000  |
| 1 | 8.677291000   | -1.862349000 | -0.838737000 |
| 1 | 10.217982000  | -1.890605000 | 0.060220000  |
| 1 | 8.675035000   | -1.802493000 | 0.951231000  |
| 1 | -9.478925000  | -1.558963000 | -0.146869000 |
| 8 | -10.255657000 | 0.910821000  | -0.083504000 |
| 1 | -10.283971000 | 1.878310000  | -0.040807000 |
| 1 | 7.542758000   | 3.994969000  | -0.079186000 |
| 8 | 9.688751000   | 2.546425000  | -0.055965000 |
| 1 | 10.313165000  | 1.805743000  | -0.040377000 |

M06/6-311++G(d,p) optimized geometry of 1:2  $\text{Fe}^{2+}$ -5OHFA complex in water.

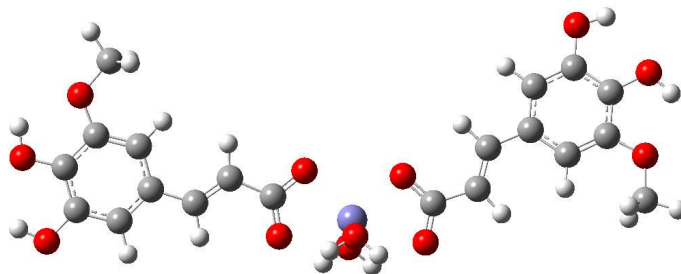

|    |              |              |              |
|----|--------------|--------------|--------------|
| 26 | 0.022874000  | -1.618239000 | 0.000427000  |
| 8  | -0.027574000 | -2.302130000 | -2.069604000 |
| 8  | -0.070947000 | -2.304820000 | 2.074380000  |
| 1  | 0.599250000  | -2.964989000 | 2.287369000  |
| 1  | -0.916597000 | -2.700463000 | 2.316938000  |
| 1  | -0.856955000 | -2.725381000 | -2.321575000 |
| 1  | 0.665889000  | -2.942516000 | -2.268957000 |
| 6  | -6.463990000 | 1.255556000  | 0.166527000  |
| 6  | -7.768480000 | 1.711718000  | 0.131986000  |
| 6  | -8.828872000 | 0.821839000  | -0.083911000 |
| 6  | -8.568466000 | -0.529377000 | -0.257427000 |
| 6  | -7.262106000 | -0.993015000 | -0.221657000 |
| 6  | -6.202031000 | -0.111290000 | -0.014691000 |
| 6  | -4.854075000 | -0.657987000 | -0.008210000 |
| 6  | -3.699546000 | 0.005199000  | 0.138004000  |
| 6  | -2.398916000 | -0.681850000 | 0.094094000  |
| 6  | -7.150908000 | 3.981814000  | 0.481271000  |
| 8  | -8.160302000 | 3.002349000  | 0.289943000  |
| 8  | -2.315853000 | -1.931552000 | -0.037722000 |
| 8  | -1.343538000 | 0.028542000  | 0.183694000  |
| 1  | -4.795250000 | -1.737485000 | -0.150829000 |
| 1  | -3.660956000 | 1.082760000  | 0.277731000  |
| 1  | -7.077369000 | -2.053902000 | -0.364418000 |
| 1  | -5.650639000 | 1.952972000  | 0.329846000  |
| 1  | -6.476254000 | 4.022940000  | -0.380633000 |
| 1  | -7.666142000 | 4.936341000  | 0.583789000  |
| 1  | -6.574614000 | 3.780452000  | 1.390556000  |
| 6  | 6.955630000  | -0.178383000 | 0.096206000  |
| 6  | 8.250514000  | 0.305508000  | 0.074621000  |
| 6  | 8.495589000  | 1.672676000  | -0.107178000 |
| 6  | 7.431305000  | 2.549448000  | -0.256490000 |
| 6  | 6.130186000  | 2.071480000  | -0.227834000 |
| 6  | 5.880363000  | 0.710312000  | -0.057872000 |
| 6  | 4.494967000  | 0.266073000  | -0.049104000 |
| 6  | 4.044969000  | -0.993662000 | 0.017709000  |
| 6  | 2.610511000  | -1.320927000 | 0.010280000  |

|   |               |              |              |
|---|---------------|--------------|--------------|
| 6 | 9.229560000   | -1.837228000 | 0.405271000  |
| 8 | 9.377588000   | -0.437798000 | 0.220602000  |
| 8 | 1.740525000   | -0.388836000 | -0.005594000 |
| 8 | 2.255856000   | -2.529280000 | 0.020004000  |
| 1 | 3.753999000   | 1.063192000  | -0.111711000 |
| 1 | 4.719348000   | -1.845269000 | 0.067377000  |
| 1 | 5.308879000   | 2.772744000  | -0.345266000 |
| 1 | 6.773436000   | -1.237487000 | 0.238389000  |
| 1 | 8.733294000   | -2.297398000 | -0.455770000 |
| 1 | 10.236969000  | -2.241251000 | 0.501061000  |
| 1 | 8.663139000   | -2.055661000 | 1.316915000  |
| 8 | -10.120503000 | 1.241871000  | -0.131490000 |
| 1 | -10.147430000 | 2.203728000  | -0.022178000 |
| 8 | 9.756134000   | 2.179507000  | -0.139323000 |
| 1 | 10.393278000  | 1.458112000  | -0.033187000 |
| 8 | -9.582280000  | -1.416848000 | -0.467136000 |
| 8 | 7.647562000   | 3.884432000  | -0.431215000 |
| 1 | -10.428828000 | -0.949810000 | -0.475854000 |
| 1 | 8.598267000   | 4.061644000  | -0.432595000 |
